# Supplementary material for: MicroRNA-183-96-182 Cluster Regulates Bovine Granulosa Cell Proliferation and Cell Cycle Transition by Coordinately Targeting FOXO1
Source: PubMed Central journal article supplement — Biol Reprod. 2016 Jun 1;94(6):127, 1-11. doi: 10.1095/biolreprod.115.137539 (PMC6702798; doi:10.1095/biolreprod.115.137539), 2016-06-01
Supplement: biolreprod.115.137539-1.pdf [file biolreprod.115.137539-1.pdf]

Gebremedhn et al., Supplemental TABLE S1: FOXO1-SiRNA and NC-siRNA constructs used in the present study.

| <b>siRNA construct</b> | <b>Sequence (5' - 3')</b>                                  |
|------------------------|------------------------------------------------------------|
| FOXO1-siRNA            | 5'-GCC AAG TCT GAC GAA A-3'<br>5'-CCG CAC GAC TTG AAA A-3' |
| NC-siRNA               | 5'-AAC ACG TCT ATA CGC-3'                                  |

Gebremedhn et al., Supplemental TABLE S2: List of primers used in this study.

| Gene         | Primer Sequence (5'-3')                          | Tm(°C) | Usage        | Accession No. |
|--------------|--------------------------------------------------|--------|--------------|---------------|
| <i>FOXO1</i> | F:AAGAGCGTGCCCTACTTCAA<br>R:CTCTTCTCCTGGGGGATTTC | 57     | qPCR         | XM_583090     |
| <i>FASL</i>  | F:AAGAGGAGGGACCACAACA<br>R:TGGGGTGACCTATTTGCTTC  | 55     | qPCR         | NM_001098859  |
| <i>FSHR</i>  | F:GCAGTCGAACTGAGGTTTGT<br>R:AGATATCGGAGGTTGGGAAG | 57     | PCR          | XM_002700755  |
| <i>LHR</i>   | F:AAACATGCCATTCCAGTCAT<br>R:GGACTGCCATTTTCTTAGCA | 57     | PCR          | NM_174381     |
| <i>PTX3</i>  | F:ACCTGGGATTCAAAGAAAGG<br>R:CACCCTCCCAGATATTGAAG | 56     | qPCR         | XM_614753     |
| <i>PTGS2</i> | F:CGATGAGCAGTTGTTCCAGA<br>R:GAAAGACGTCAGGCAGAAGG | 55     | qPCR         | NM_174445     |
| <i>GAPDH</i> | F:AATGGAGCCATCACCATC<br>R:GTGGTTCACGCCCATCACA    | 55     | PCR,<br>qPCR | NM_001034034  |

Gebremedhn et al., Supplemental TABLE S3: Cell cycle distribution of granulosa cells transfected with miR-183~96~182 Cluster miRNAs inhibitors.

| <b>Product</b> | <b>G0/G1 (%)</b> | <b>S (%)</b> | <b>G2/M (%)</b> |
|----------------|------------------|--------------|-----------------|
| miR-183-Inh    | 73.92 ±0.52      | 12.14 ±0.77  | 13.94 ±1.28     |
| miR-96-Inh     | 72.20 ±0.78      | 13.56 ±0.36  | 14.23 ±1.15     |
| miR-182-Inh    | 72.91 ±0.26      | 12.97 ±0.52  | 14.11 ±0.78     |
| Pool-Inh       | 72.56 ±0.86      | 13.27 ±1.08  | 14.17 ±0.28     |
| NC-Inh         | 73.74 ±0.99      | 11.89 ±0.63  | 14.38 ±1.47     |
